# Supplementary material
Source: PubMed Central journal article supplement (PMC6331260)

### **Supplemental Figure Legends:**

**Supplemental Figure 1: TEM of AgNPs.** (A) 20 nm AgNP ( $21.92 \pm 3.03$  nm, N=20) (B) 100 nm AgNPs ( $91.07 \pm 6.54$  nm, N=20)

**Supplemental Figure 2: Dissolution of 20 nm and 100 nm AgNPs.** Dissolution of 20nm and 100nm with various BC was measured after 24 hours incubation at 37 °C in unsupplemented DMEM/F12. Dissolution in the supernatant was statistically different compared to uncoated NPs ( $p < 0.05$ , N=3).

**Supplemental Figure 3: Viability at 24 hours following AgNP exposure.** Viability study of RAEC exposed to 20nm or 100nm AgNP with various BC for 3hrs. Media was changed after exposure and an MTS assay was performed after 24 hrs. \*-one way Anova, statistically significant compared to ctrl ( $p < 0.05$ ) N=3.

**Supplemental Figure 4: Hyperspectral overlay of internalized AgNPs:** Hyperspectral overlay of AgNPs internalized with various BC. A minimum of 1000 pixels were selected to generate the mean spectral profiles.

Supplemental Figure 1:

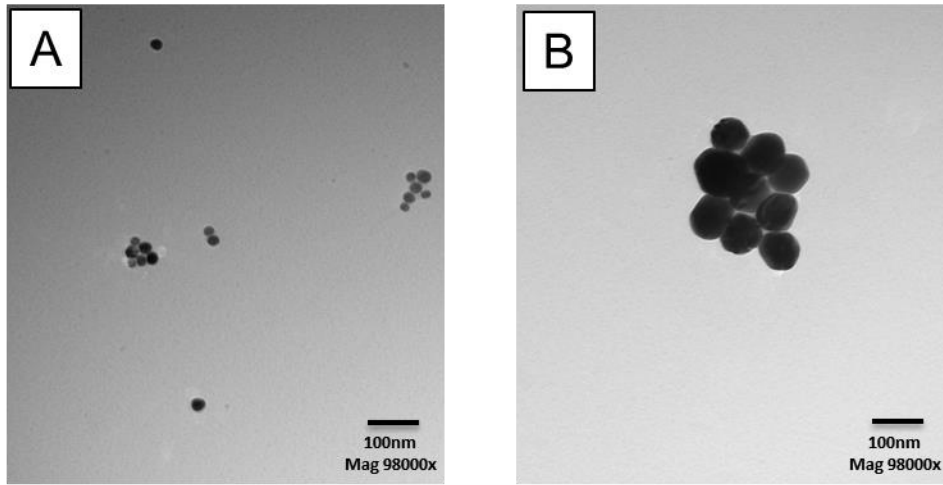

Supplemental Figure 2:

A

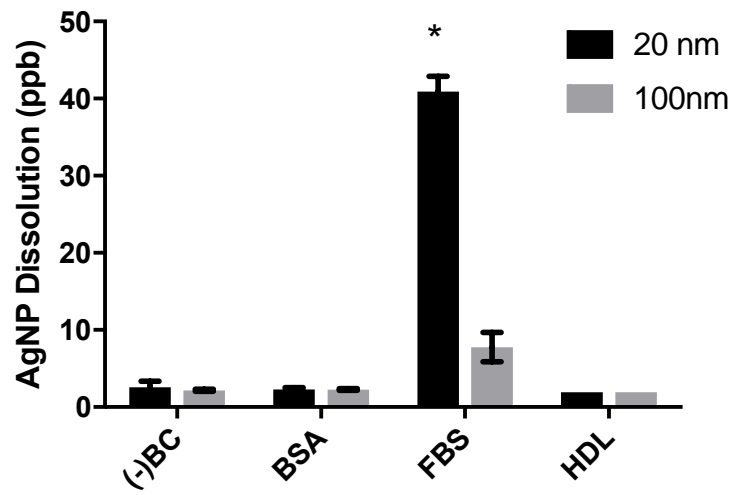

**B**

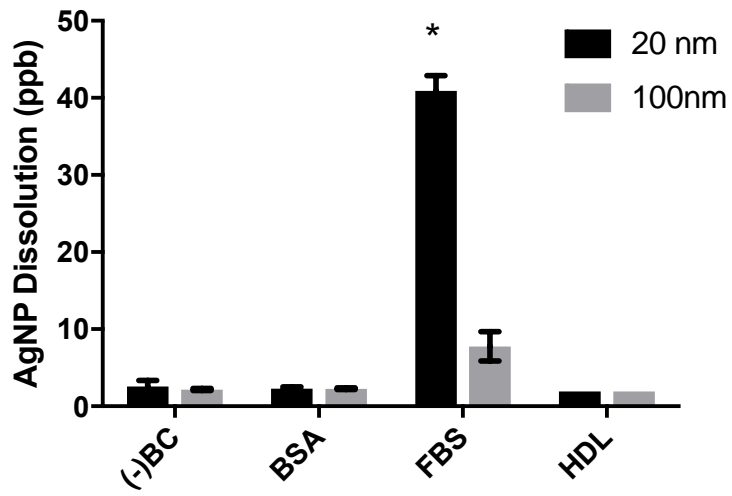

**Supplemental Figure 3:**

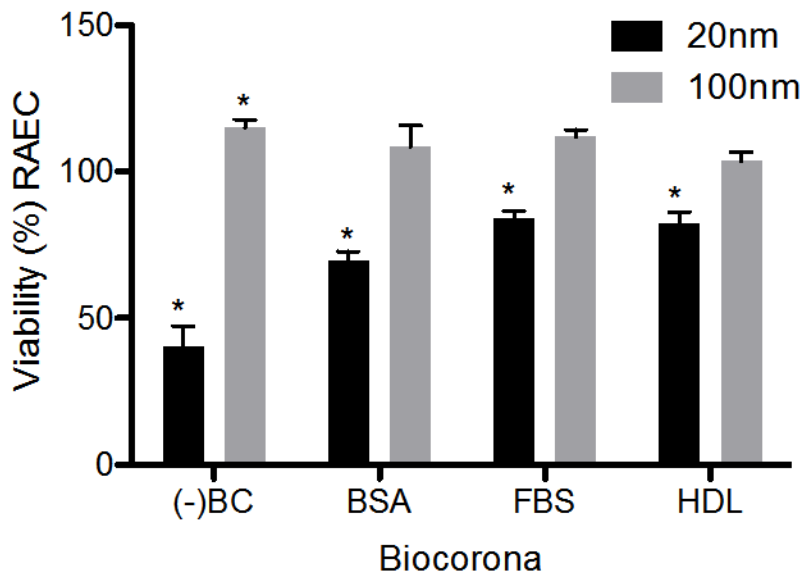

**Supplemental Figure 4:**

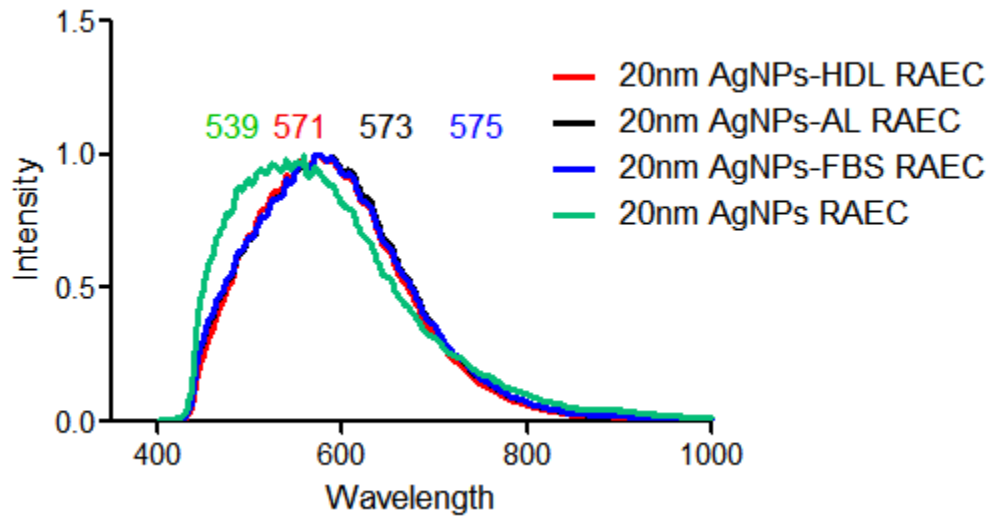

Supplement: NIHMS1515863-supplement-1.pdf [file NIHMS1515863-supplement-1.pdf]
